# Supplementary material for: Mapping the core senescence phenotype of primary human colon fibroblasts
Source: publisher site journal article supplement (doi:10.18632/aging.205577), 2024-02-21
Supplement: Supplementary file [file aging-v16i4-205577-supplementary-material-SD1.pdf]

## SUPPLEMENTARY FIGURE

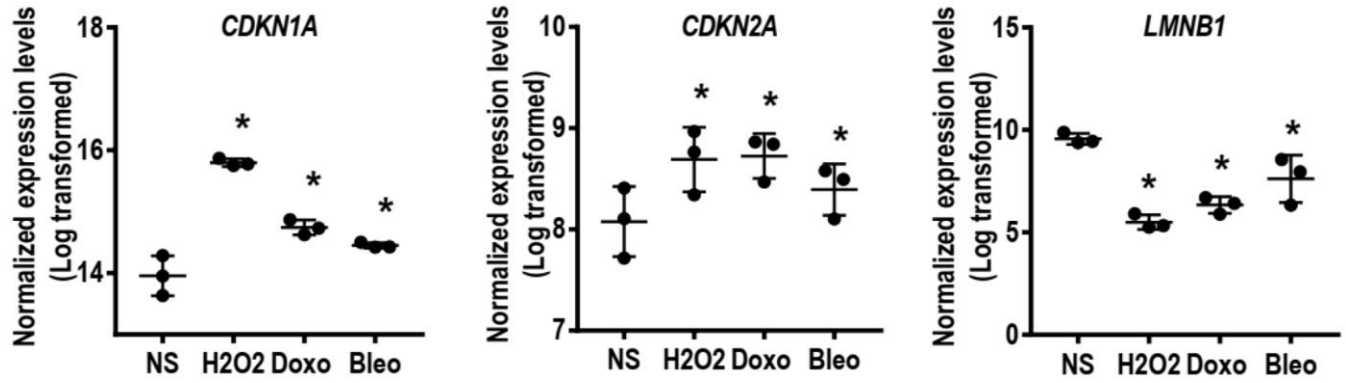

Supplementary Figure 1. Changes in expression of *CDKN1A*, *CDKN2A* and *LMNB1*, which are markers of senescence. Data represented are normalized gene expression values obtained from RNA sequencing data of non-senescent and senescent fibroblast lines from three subjects. \*FDR≤0.001 versus NS using One-way ANOVA with Benjamini and Hochberg correction for false discovery rate.
